# Supplementary material for: Indazole-based deep-blue-emitting hot exciton material: conjugated polycyclic aromaticity molecular design
Source: Royal Society of Chemistry journal article supplement (doi:10.1039/d4tc02221a), 2024-01-01
Supplement: d4tc02221a1.pdf [file d4tc02221a1.pdf]

## Supporting Information

### Indazole-based deep blue-emitting hot exciton material: Conjugated polycyclic aromaticity molecular design

Xiangbin Tian,<sup>a</sup> Long Wang,<sup>\*a</sup> Mingkai Shi,<sup>a</sup> Qianqian Deng,<sup>b</sup> Lu Lu,<sup>a</sup> Xiaomei Shi,<sup>\*c</sup> Yanqin Miao,<sup>\*a</sup>  
Jun Zhu<sup>\*b</sup> and Hua Wang<sup>\*a</sup>

<sup>a</sup>*Key Laboratory of Interface Science and Engineering in Advanced Materials, Ministry of Education, Taiyuan University of Technology, Taiyuan 030024, P. R. China. Email: wanglong@tyut.edu.cn, miaoyanqin@tyut.edu.cn, wanghua001@tyut.edu.cn*

<sup>b</sup>*School of Science and Engineering, The Chinese University of Hong Kong, Shenzhen 518172, P. R. China. Email: jun.zhu@cuhk.edu.cn*

<sup>c</sup>*Department of Biochemistry and Molecular Biology, Shanxi Medical University, Taiyuan 030001, P. R. China. Email: shxm@sxmu.edu.cn*

# Table of Contents

|                                                                                  |           |
|----------------------------------------------------------------------------------|-----------|
| <b>1. Theoretical Calculation.</b>                                               | <b>S3</b> |
| <b>2. Photophysical Properties.</b>                                              | <b>S5</b> |
| <b>3. Electrochemical and Thermal Properties.</b>                                | <b>S6</b> |
| <b>4. Electroluminescence Performance.</b>                                       | <b>S6</b> |
| <b>5. Appendix (NMR Spectra, Single Crystal data and Cartesian Coordinates).</b> | <b>S8</b> |

## 1. Theoretical Calculations.

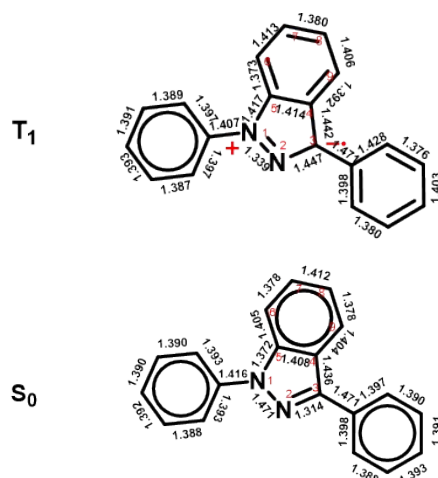

**Figure S1.** Bond length (Å) of IND in the  $S_0$  and  $T_1$  states.

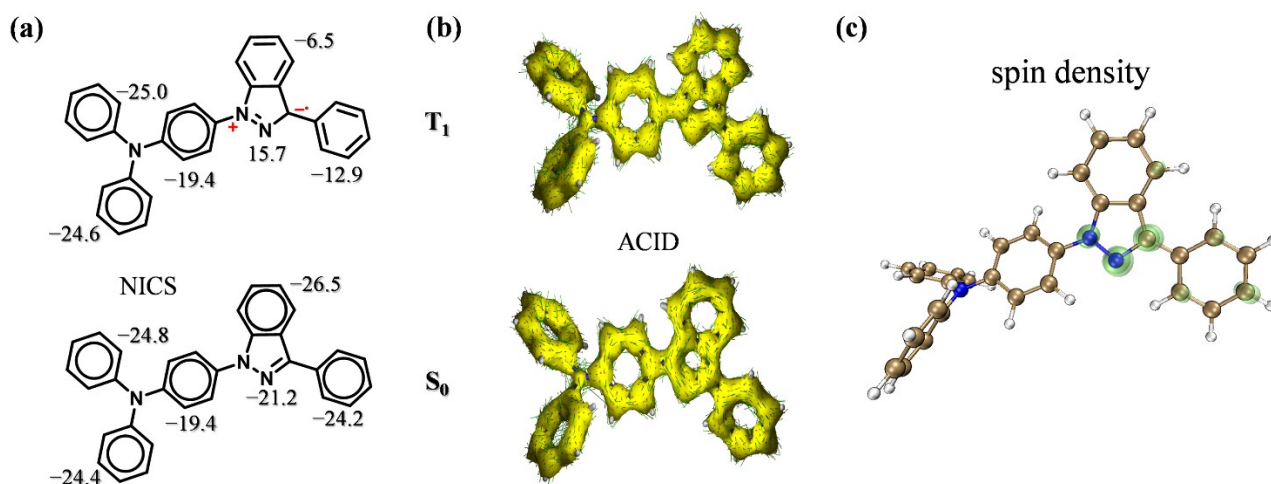

**Figure S2.** Aromaticity analysis for IND-DPA. (a) NICS(1)<sub>zz</sub> values (ppm) and (b) ACID plots in the  $S_0$  and  $T_1$  states. (c) Spin density distributions (isovalue: 0.015 a.u.) in the  $T_1$  state.

In the ground state ( $S_0$ ), all heterocycles and benzene rings of IND-DPA exhibit negative NICS(1)<sub>zz</sub> values (-21.2, -26.5, -24.2, -19.4, -24.4 and -24.6 ppm). This observation clearly indicates the presence of unique aromaticity within this system (Figure S2a). In the  $T_1$  state, the N-position benzene ring and diphenylamine continue to display negative NICS(1)<sub>zz</sub> values, while the other two benzene rings show a slight weakening of their NICS(1)<sub>zz</sub> values to negatives (-6.5 ppm), suggesting antiaromaticity. Conversely, positive NICS(1)<sub>zz</sub> values are observed on the heterocycles (15.7 ppm), indicating antiaromaticity. Additionally, ACID analysis yielded similar conclusions (Figure S2b). In the  $S_0$  state, clockwise ring currents indicate that all rings are aromatic; however, in contrast, in the  $T_1$  state all benzene rings maintain their aromaticity while the heterocycles exhibit slight

counterclockwise currents indicating weak antiaromaticity. To further investigate the origin of aromaticity of benzene rings in T<sub>1</sub> state we conducted an extensive study of their spindensity (Figure S2c). It is found that the spin density is not only mainly delocalized on the heterocycle, but also presents on the adjacent and one of peripheral benzene rings, resulting in the aromaticity differences in the T<sub>1</sub> state.

**Table S1.** Vertical excitation energies (Unit: eV) of IND at the level of TDA-M06-2X/6-311G(d).

| IND             | Excitation Energy (eV) |                 | Excitation Energy (eV) |
|-----------------|------------------------|-----------------|------------------------|
| S <sub>1</sub>  | 3.77                   | T <sub>1</sub>  | 2.28                   |
| S <sub>2</sub>  | 4.80                   | T <sub>2</sub>  | 3.75                   |
| S <sub>3</sub>  | 4.95                   | T <sub>3</sub>  | 3.99                   |
| S <sub>4</sub>  | 5.02                   | T <sub>4</sub>  | 4.13                   |
| S <sub>5</sub>  | 5.06                   | T <sub>5</sub>  | 4.41                   |
| S <sub>6</sub>  | 5.41                   | T <sub>6</sub>  | 4.57                   |
| S <sub>7</sub>  | 5.50                   | T <sub>7</sub>  | 4.65                   |
| S <sub>8</sub>  | 5.68                   | T <sub>8</sub>  | 4.78                   |
| S <sub>9</sub>  | 5.76                   | T <sub>9</sub>  | 4.89                   |
| S <sub>10</sub> | 5.92                   | T <sub>10</sub> | 4.94                   |

**Table S2.** Vertical excitation energies (Unit: eV) of IND-DPA at the level of M06-2X/6-311G(d).

|         | Excited States  | Excitation Energy (eV) | Excited States  | Excitation Energy (eV) |
|---------|-----------------|------------------------|-----------------|------------------------|
| IND-DPA | S <sub>1</sub>  | 3.34                   | T <sub>1</sub>  | 2.02                   |
|         | S <sub>2</sub>  | 4.02                   | T <sub>2</sub>  | 3.25                   |
|         | S <sub>3</sub>  | 4.13                   | T <sub>3</sub>  | 3.34                   |
|         | S <sub>4</sub>  | 4.24                   | T <sub>4</sub>  | 3.57                   |
|         | S <sub>5</sub>  | 4.65                   | T <sub>5</sub>  | 3.57                   |
|         | S <sub>6</sub>  | 4.71                   | T <sub>6</sub>  | 3.70                   |
|         | S <sub>7</sub>  | 4.80                   | T <sub>7</sub>  | 3.93                   |
|         | S <sub>8</sub>  | 4.83                   | T <sub>8</sub>  | 4.09                   |
|         | S <sub>9</sub>  | 5.00                   | T <sub>9</sub>  | 4.14                   |
|         | S <sub>10</sub> | 5.06                   | T <sub>10</sub> | 4.17                   |
|         | S <sub>8</sub>  | 5.03                   | T <sub>8</sub>  | 4.03                   |
|         | S <sub>9</sub>  | 5.05                   | T <sub>9</sub>  | 4.14                   |
|         | S <sub>10</sub> | 5.15                   | T <sub>10</sub> | 4.21                   |
|         | S <sub>6</sub>  | 4.23                   | T <sub>6</sub>  | 3.55                   |
|         | S <sub>7</sub>  | 4.46                   | T <sub>7</sub>  | 3.62                   |
|         | S <sub>8</sub>  | 4.55                   | T <sub>8</sub>  | 3.64                   |
|         | S <sub>9</sub>  | 4.58                   | T <sub>9</sub>  | 3.79                   |
|         | S <sub>10</sub> | 4.64                   | T <sub>10</sub> | 3.83                   |

## 2. Photophysical Properties.

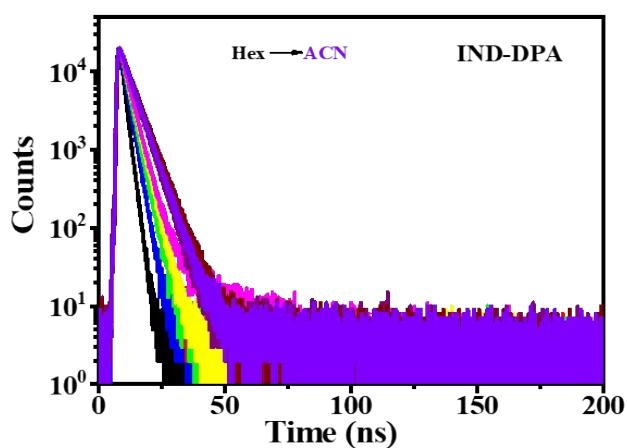

**Figure S3.** The time-resolved PL decay spectra of IND-DPA in different solvents.

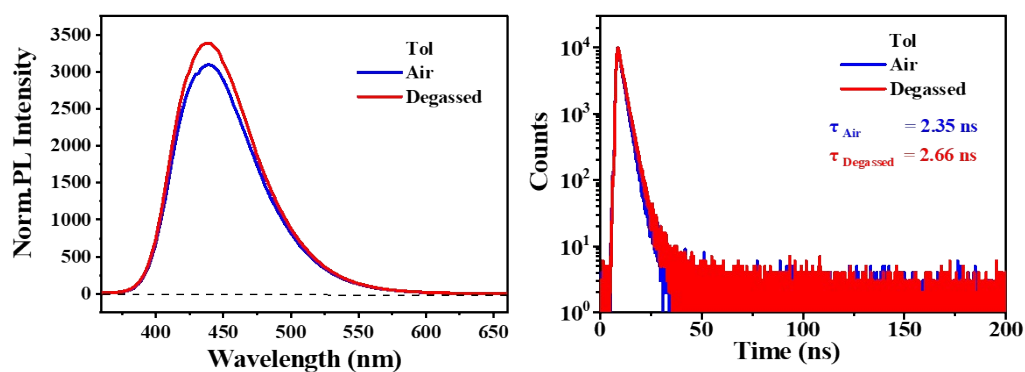

**Figure S4.** The PL and time-resolved PL measurements of IND-DPA solution (Toluene  $10^{-5}$  M) in oxygen and deoxygenated conditions.

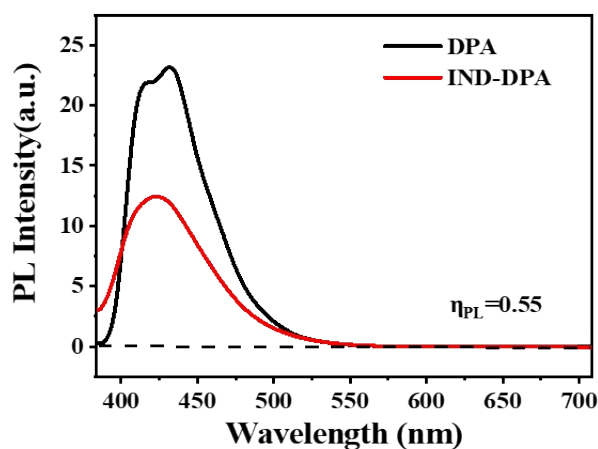

**Figure S5.** The relative fluorescence quantum yield determination of IND-DPA in cyclohexane solution.

### 3. Electrochemical and Thermal Properties.

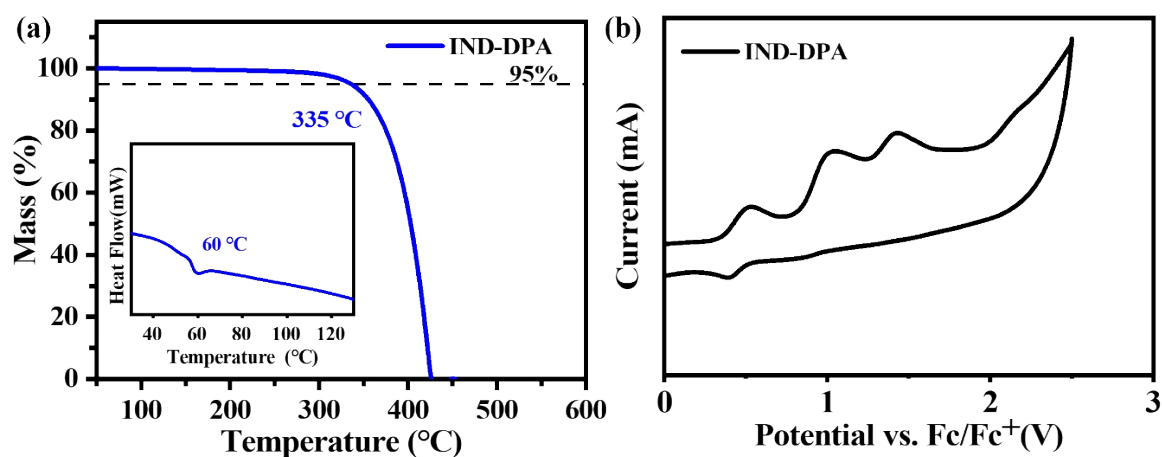

Figure S6. (a) TGA (insert: DSC curves) and CV curve of IND-DPA.

### 4. Electroluminescence Performance.

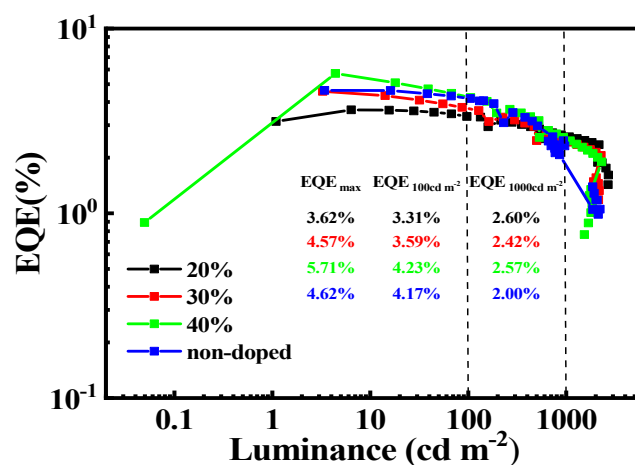

Figure S7. *L*-EQE curves of Device A, A1, A2, A3

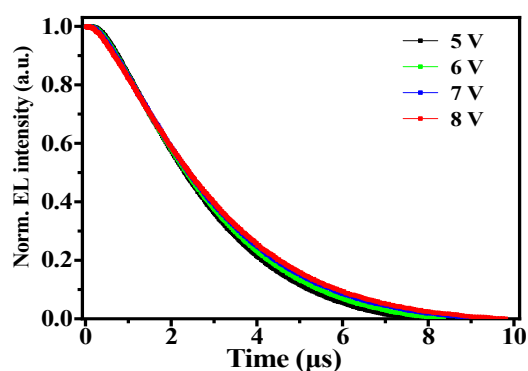

Figure S8. The transient EL decay curves of the IND-DPA doped device A3.

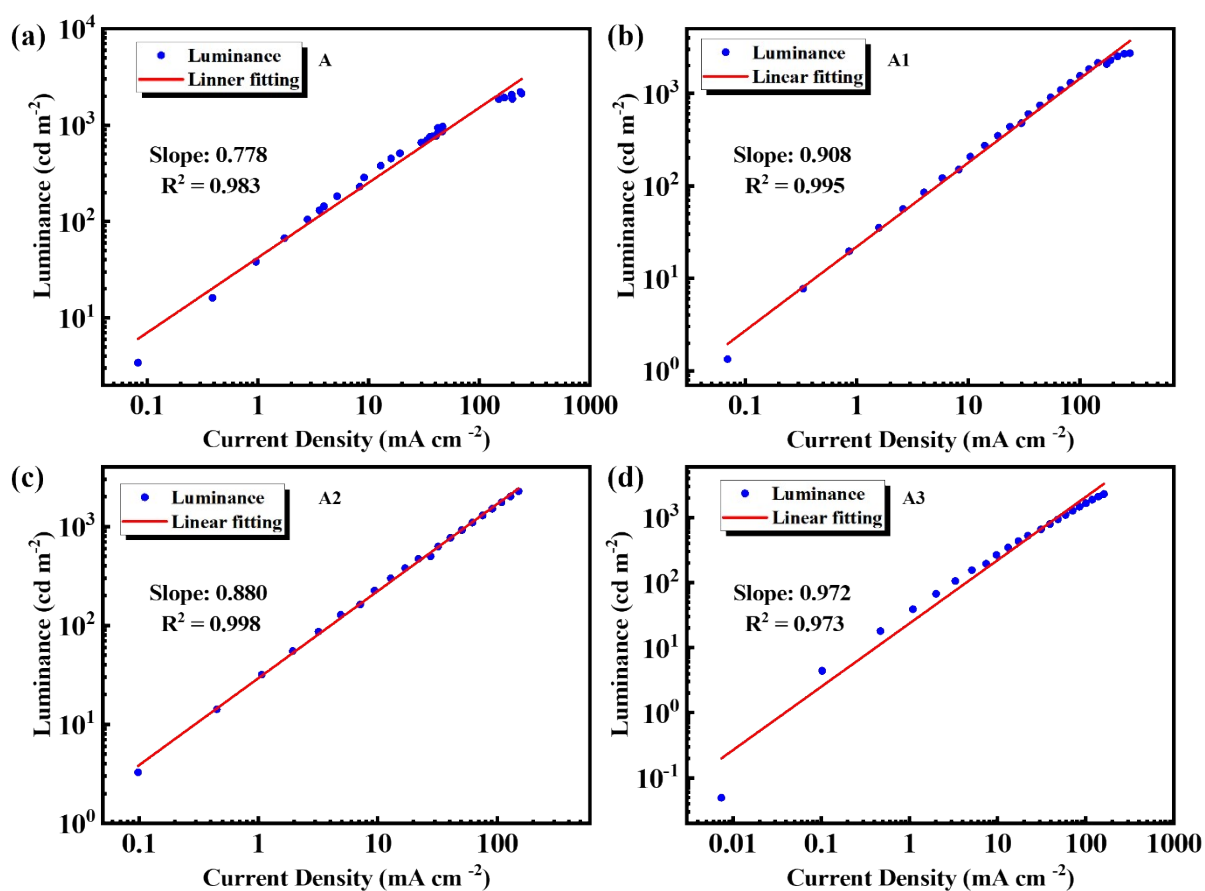

**Figure S9.** Current density luminance curve of the non-doped device (a) A, and the doped device (b) A1, (c) A2, and (d) A3.

## 5. Appendix.

### NMR Spectra.

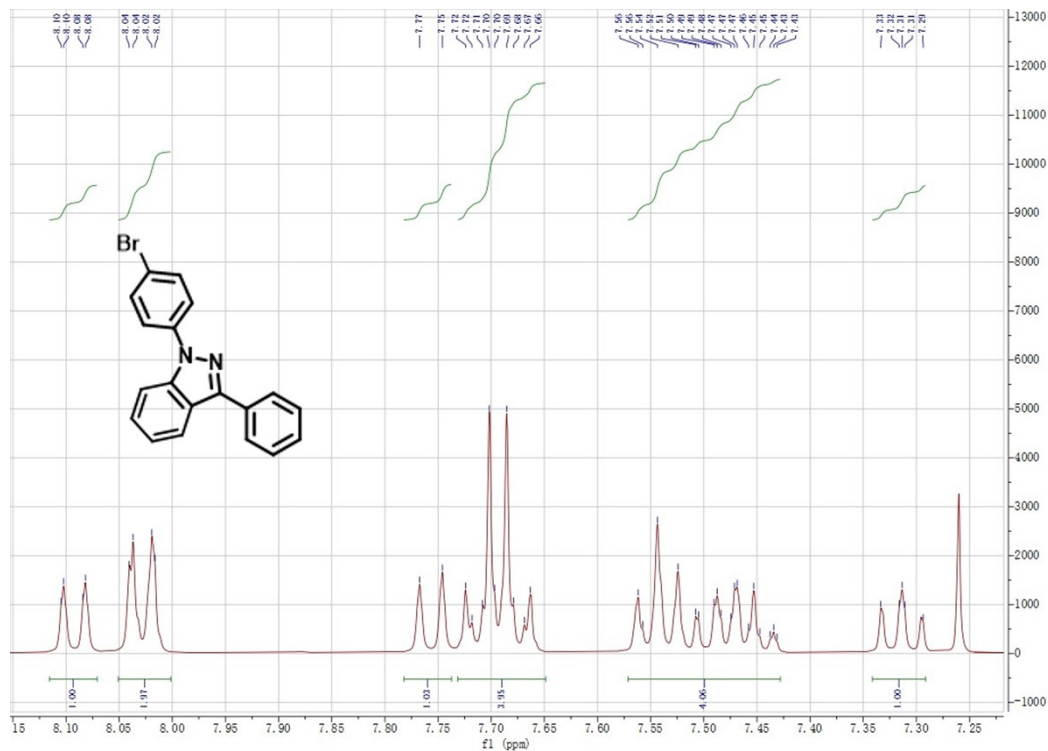

Figure S10. <sup>1</sup>H NMR of the intermediate M2 molecule (CDCl<sub>3</sub>, 298 K).

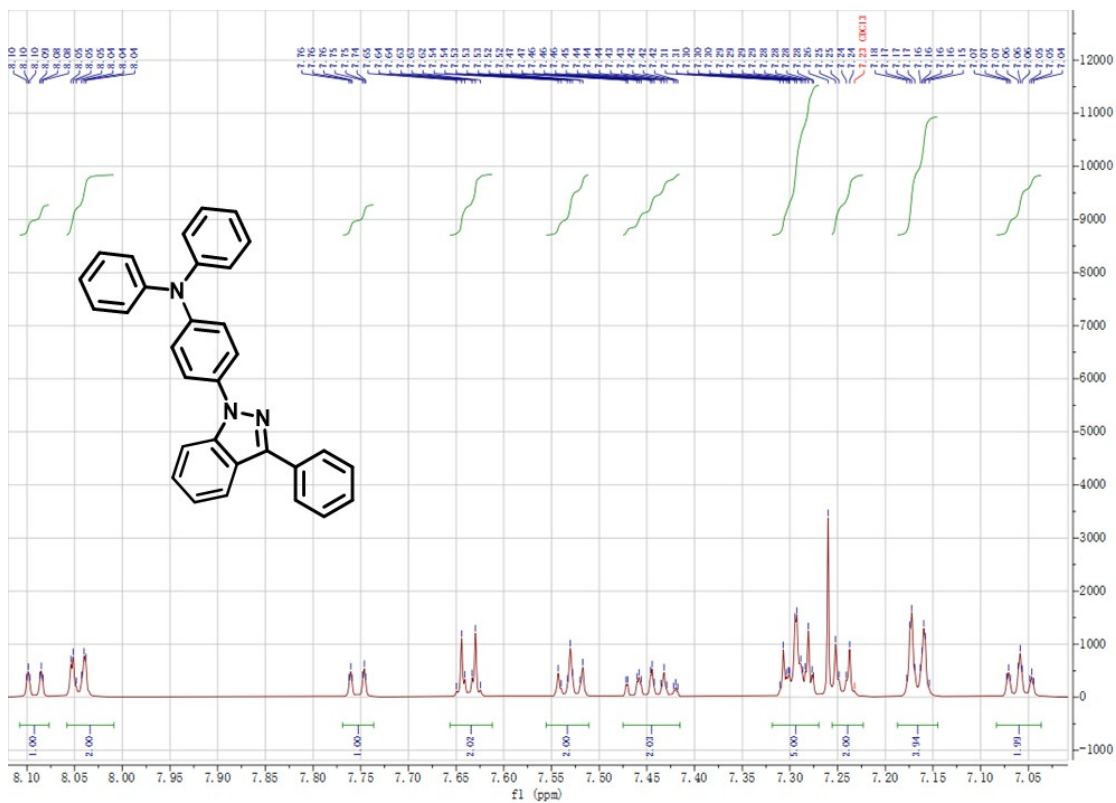

Figure S11. <sup>1</sup>H NMR of IND-TPA molecule (CDCl<sub>3</sub>, 298 K).



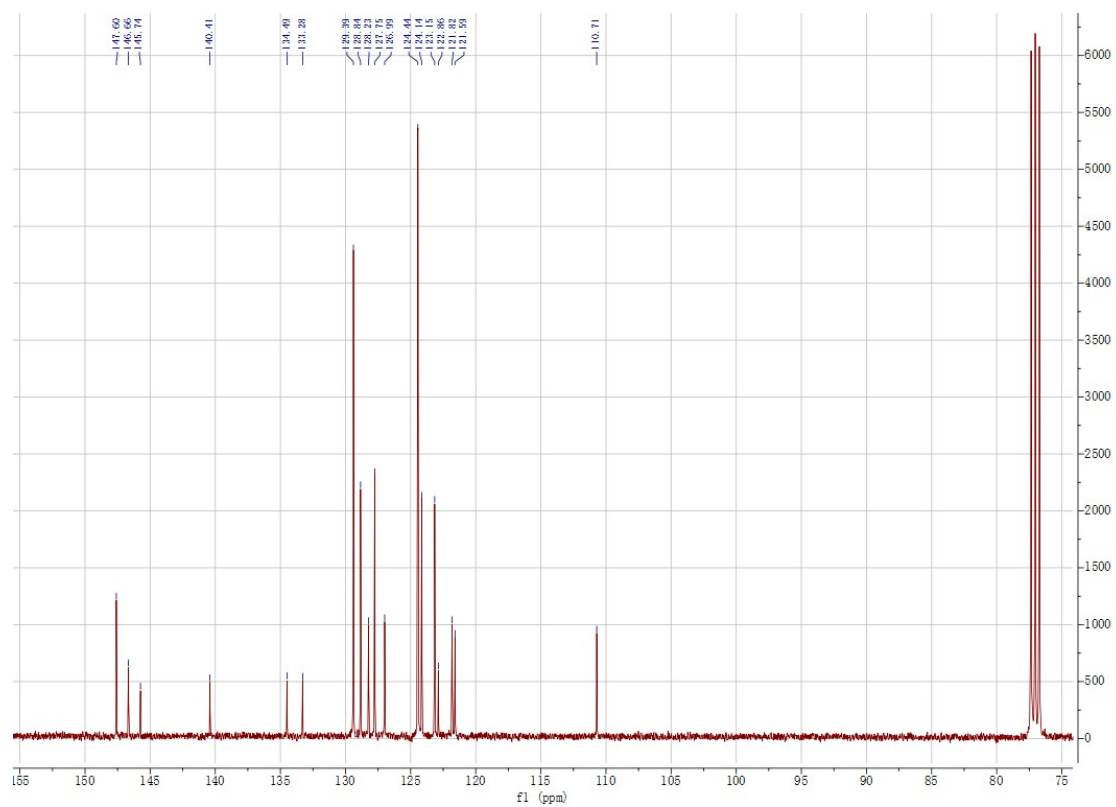

**Figure S12.**  $^{13}\text{C}$  NMR of IND-DPA molecule ( $\text{CDCl}_3$ , 298 K).

### Single Crystal Data of IND-DPA.

| Compound                                  | IND-DPA (CCDC: 2349041)                                       |
|-------------------------------------------|---------------------------------------------------------------|
| Empirical formula                         | C <sub>31</sub> H <sub>23</sub> N <sub>3</sub>                |
| Formula weight                            | 437.52                                                        |
| Temperature/K                             | 303.68(10)                                                    |
| Crystal system                            | triclinic                                                     |
| Space group                               | P-1                                                           |
| a/b/c/Å                                   | 9.9644(3)/ 10.5293(4)/ 13.1479(4)                             |
| α/β/γ/°                                   | 66.575(3)/86.720(3)/68.737(3)                                 |
| Volume/Å <sup>3</sup>                     | 1173.48(7)                                                    |
| Z                                         | 2                                                             |
| ρ <sub>calc</sub> /cm <sup>3</sup>        | 1.238                                                         |
| μ/mm <sup>-1</sup>                        | 0.566                                                         |
| F(000)                                    | 460.0                                                         |
| Crystal size/mm <sup>3</sup>              | 0.14 × 0.12 × 0.09                                            |
| Radiation                                 | Cu Kα (λ = 1.54184)                                           |
| 2θ range for data collection/°            | 7.366 to 152.194                                              |
| Index ranges                              | -11 ≤ h ≤ 12, -13 ≤ k ≤ 13, -15 ≤ l ≤ 16                      |
| Reflections collected                     | 13931                                                         |
| Independent reflections                   | 4680 [R <sub>int</sub> = 0.0257, R <sub>sigma</sub> = 0.0255] |
| Data/restraints/parameters                | 4680/0/308                                                    |
| Goodness-of-fit on F <sup>2</sup>         | 1.067                                                         |
| Final R indexes [I ≥ 2σ (I)]              | R <sub>1</sub> = 0.0394, wR <sub>2</sub> = 0.1095             |
| Final R indexes [all data]                | R <sub>1</sub> = 0.0431, wR <sub>2</sub> = 0.1125             |
| Largest diff. peak/hole/e Å <sup>-3</sup> | 0.16/-0.16                                                    |

### Cartesian Coordinates

**IND (S<sub>0</sub>)**

|   |             |             |             |
|---|-------------|-------------|-------------|
| C | -0.73960400 | 1.28836600  | 0.00380300  |
| C | 0.66738000  | 1.34117500  | -0.01430900 |
| C | 1.07789300  | -0.03574800 | -0.01340800 |
| N | 0.02825500  | -0.82777100 | -0.00937900 |
| N | -1.07292600 | -0.04333000 | -0.00893900 |
| C | -1.52603500 | 2.45055000  | 0.06424600  |
| C | -0.85851300 | 3.65689600  | 0.05623100  |
| C | 0.55039100  | 3.72955300  | -0.01742800 |
| C | 1.31920000  | 2.58612000  | -0.04913800 |
| C | -2.36044200 | -0.63362200 | 0.02234500  |
| C | 2.44108200  | -0.58991800 | -0.03860900 |
| C | 3.48965600  | 0.06522500  | 0.61313900  |
| C | 4.77461400  | -0.46677200 | 0.58923500  |
| C | 5.02495800  | -1.66021300 | -0.08038400 |
| C | 3.98208200  | -2.32378500 | -0.72288900 |
| C | 2.69911200  | -1.79244300 | -0.70426800 |
| C | -3.39770000 | -0.08578300 | -0.72917400 |
| C | -4.65880200 | -0.67026000 | -0.68066700 |
| C | -4.87915400 | -1.80476700 | 0.09325900  |
| C | -3.82919600 | -2.35825100 | 0.82202900  |
| C | -2.56984300 | -1.77359000 | 0.79606500  |
| H | -2.60565500 | 2.40846500  | 0.12645900  |
| H | -1.43146700 | 4.57575800  | 0.10368700  |
| H | 1.02837300  | 4.70146400  | -0.04351000 |
| H | 2.39921700  | 2.64872500  | -0.10774000 |
| H | 3.29559800  | 0.97663800  | 1.16739700  |
| H | 5.57859900  | 0.04822600  | 1.10249900  |
| H | 6.02679700  | -2.07363000 | -0.09937600 |
| H | 4.17086100  | -3.25498800 | -1.24486300 |

|   |             |             |             |
|---|-------------|-------------|-------------|
| H | 1.88549100  | -2.29970500 | -1.20971300 |
| H | -3.21270900 | 0.76845800  | -1.36916200 |
| H | -5.46549100 | -0.24440700 | -1.26570000 |
| H | -5.86173500 | -2.26047500 | 0.12275000  |
| H | -3.99245200 | -3.24539100 | 1.42272300  |
| H | -1.74520600 | -2.18782100 | 1.36230300  |

**IND (T<sub>1</sub>)**

|   |             |             |             |
|---|-------------|-------------|-------------|
| C | 0.72637400  | 1.30598900  | -0.02913500 |
| C | -0.68503400 | 1.39281900  | -0.04231500 |
| C | -1.16012100 | 0.03080400  | -0.00601300 |
| N | -0.03031300 | -0.87463600 | -0.01635400 |
| N | 1.04289300  | -0.07447300 | 0.03334400  |
| C | 1.54816100  | 2.40050800  | -0.14506500 |
| C | 0.93023300  | 3.66778200  | -0.23777200 |
| C | -0.44498900 | 3.78615400  | -0.23451700 |
| C | -1.27137300 | 2.65170600  | -0.14979100 |
| C | 2.33046100  | -0.64335900 | 0.03766900  |
| C | -2.44419800 | -0.52403300 | 0.04643500  |
| C | -3.63167900 | 0.25777200  | 0.18026400  |
| C | -4.87016000 | -0.34175800 | 0.21331100  |
| C | -4.99599700 | -1.73621700 | 0.12062800  |
| C | -3.84735200 | -2.52457400 | 0.00731200  |
| C | -2.59546200 | -1.94468200 | -0.02469000 |
| C | 3.36999300  | -0.04340300 | 0.75279400  |
| C | 4.62896500  | -0.63078900 | 0.74942900  |
| C | 4.85524500  | -1.81278800 | 0.05032100  |
| C | 3.80712200  | -2.41654600 | -0.64130600 |
| C | 2.54525100  | -1.84029500 | -0.65128200 |
| H | 2.62489800  | 2.31258200  | -0.18908400 |

|   |             |             |             |
|---|-------------|-------------|-------------|
| H | 1.55239600  | 4.55059100  | -0.32085400 |
| H | -0.90206300 | 4.76526600  | -0.31370000 |
| H | -2.34264500 | 2.78209100  | -0.19892100 |
| H | -3.56536800 | 1.33076400  | 0.28784200  |
| H | -5.75723600 | 0.27211300  | 0.32076400  |
| H | -5.97608300 | -2.19714900 | 0.14576400  |
| H | -3.93818000 | -3.60321400 | -0.05489700 |
| H | -1.70797200 | -2.55651600 | -0.11106400 |
| H | 3.18509400  | 0.84552400  | 1.34238900  |
| H | 5.43196000  | -0.16775700 | 1.31077400  |
| H | 5.83925800  | -2.26614900 | 0.05232500  |
| H | 3.97411100  | -3.34085300 | -1.18198800 |
| H | 1.72111800  | -2.29407500 | -1.18594000 |

**IND (S<sub>I</sub>)**

|   |             |             |             |
|---|-------------|-------------|-------------|
| C | -0.74964100 | 1.33238700  | 0.05737600  |
| C | 0.66293800  | 1.40002200  | -0.04383100 |
| C | 1.10807500  | 0.02331100  | -0.03526300 |
| N | 0.03790700  | -0.82819100 | 0.01339300  |
| N | -1.06613000 | -0.03368200 | 0.02734600  |
| C | -1.54975700 | 2.44915100  | 0.23812900  |
| C | -0.91699600 | 3.70723700  | 0.21753300  |
| C | 0.45306400  | 3.80242800  | 0.03423100  |
| C | 1.26251600  | 2.66141500  | -0.09412100 |
| C | -2.30906900 | -0.62548500 | 0.00050500  |
| C | 2.42095400  | -0.52859900 | -0.04324400 |
| C | 3.60191000  | 0.25649700  | 0.02892800  |
| C | 4.84792100  | -0.33804900 | 0.02275600  |
| C | 4.97618700  | -1.73049200 | -0.05599700 |
| C | 3.82652600  | -2.52284200 | -0.11825800 |

|   |             |             |             |
|---|-------------|-------------|-------------|
| C | 2.57191700  | -1.94548300 | -0.10857400 |
| C | -3.45321200 | 0.06047700  | -0.46849700 |
| C | -4.67622800 | -0.58146900 | -0.47568700 |
| C | -4.79662500 | -1.89980900 | -0.02510900 |
| C | -3.65979600 | -2.58872400 | 0.40507000  |
| C | -2.42144300 | -1.97734400 | 0.40898900  |
| H | -2.61058800 | 2.37957800  | 0.42844700  |
| H | -1.51358600 | 4.60143900  | 0.34664200  |
| H | 0.92104800  | 4.77955800  | 0.00076500  |
| H | 2.32476900  | 2.79017300  | -0.23851500 |
| H | 3.53807200  | 1.33061900  | 0.12152300  |
| H | 5.73458200  | 0.28266000  | 0.08601800  |
| H | 5.95841000  | -2.18848900 | -0.06400700 |
| H | 3.91808400  | -3.60190400 | -0.17632600 |
| H | 1.68275100  | -2.55950700 | -0.16780400 |
| H | -3.36315400 | 1.04902200  | -0.89494300 |
| H | -5.54508400 | -0.05759300 | -0.85622000 |
| H | -5.76283200 | -2.38960200 | -0.02835100 |
| H | -3.74501600 | -3.61542500 | 0.74143900  |
| H | -1.53534100 | -2.49519600 | 0.74656200  |

**IND-DPA (S<sub>0</sub>)**

|   |           |           |          |
|---|-----------|-----------|----------|
| C | -5.175475 | -0.899959 | 0.677995 |
| C | -6.387675 | -1.027132 | -0.00554 |
| C | -7.427109 | -1.773927 | 0.539199 |
| C | -7.265645 | 2.405056  | 1.768629 |
| C | -6.056475 | -2.289861 | 2.450515 |
| C | -5.018905 | -1.541675 | 1.910856 |
| C | -4.064618 | -0.12018  | 0.108321 |
| N | -2.816328 | -0.465162 | 0.33836  |

|   |           |           |           |
|---|-----------|-----------|-----------|
| C | -4.115317 | 1.064647  | -0.701995 |
| N | -2.023448 | 0.434568  | -0.285103 |
| C | -0.615331 | 0.300766  | -0.21285  |
| C | -2.764589 | 1.381179  | -0.946117 |
| C | -2.390958 | 2.466385  | -1.756118 |
| C | -3.408464 | 3.243983  | -2.266706 |
| C | -4.76663  | 2.972741  | -1.987937 |
| C | -5.130001 | 1.890539  | -1.215567 |
| C | 0.196629  | 1.423798  | -0.077736 |
| C | 1.575091  | 1.280641  | -0.015129 |
| C | 2.163351  | 0.01191   | -0.040568 |
| C | 1.332602  | -1.11085  | -0.14498  |
| C | -0.040948 | -0.96814  | -0.247755 |
| N | 3.562651  | -0.135047 | 0.049402  |
| C | 4.219685  | -1.184831 | -0.64171  |
| C | 4.325496  | 0.745652  | 0.858423  |
| C | 5.55836   | 1.221248  | 0.402913  |
| C | 6.317848  | 2.069136  | 1.1992    |
| C | 5.853776  | 2.467671  | 2.449534  |
| C | 4.621985  | 2.00126   | 2.900155  |
| C | 3.864008  | 1.138538  | 2.117424  |
| C | 5.239017  | -1.905857 | -0.013962 |
| C | 5.896333  | -2.923376 | -0.694352 |
| C | 5.535848  | -3.248234 | -1.998954 |
| C | 4.514587  | -2.536387 | -2.621789 |
| C | 3.86411   | -1.504944 | -1.954795 |
| H | -6.508625 | -0.56785  | -0.980465 |
| H | -8.361372 | -1.869347 | -0.002388 |
| H | -8.076555 | -2.986013 | 2.192962  |
| H | -5.924368 | -2.779421 | 3.408846  |

|   |           |           |           |
|---|-----------|-----------|-----------|
| H | -4.078025 | -1.442286 | 2.439793  |
| H | -1.354496 | 2.682286  | -1.981661 |
| H | -3.158276 | 4.091033  | -2.895251 |
| H | -5.529309 | 3.626691  | -2.393584 |
| H | -6.173448 | 1.689381  | -1.003397 |
| H | -0.244516 | 2.410435  | -0.002279 |
| H | 2.200467  | 2.160845  | 0.076184  |
| H | 1.770615  | -2.101953 | -0.154959 |
| H | -0.680628 | -1.837912 | -0.330832 |
| H | 5.917392  | 0.918662  | -0.574488 |
| H | 7.273121  | 2.428658  | 0.833355  |
| H | 6.446119  | 3.132997  | 3.066632  |
| H | 4.25191   | 2.298399  | 3.874947  |
| H | 2.912201  | 0.765426  | 2.479161  |
| H | 5.513744  | -1.661505 | 1.006133  |
| H | 6.686987  | -3.472207 | -0.195027 |
| H | 6.045865  | -4.046836 | -2.524893 |
| H | 4.228917  | -2.774452 | -3.640319 |
| H | 3.078621  | -0.943635 | -2.448707 |

**IND-DPA (S<sub>1</sub>)**

|   |           |           |           |
|---|-----------|-----------|-----------|
| C | -5.150727 | -0.951041 | 0.461147  |
| C | -6.482566 | -0.725114 | 0.054807  |
| C | -7.49551  | -1.597403 | 0.419568  |
| C | -7.219493 | -2.72468  | 1.195143  |
| C | -5.90406  | -2.973039 | 1.589609  |
| C | -4.884073 | -2.108988 | 1.228258  |
| C | -4.064126 | -0.073271 | 0.097625  |
| N | -2.788831 | -0.499828 | 0.256352  |
| C | -4.095656 | 1.259483  | -0.430519 |
| N | -1.982857 | 0.52882   | -0.150254 |



|   |           |           |           |
|---|-----------|-----------|-----------|
| C | -0.633487 | 0.389972  | -0.047693 |
| C | -2.739422 | 1.617655  | -0.634482 |
| C | -2.3663   | 2.787986  | -1.277964 |
| C | -3.38078  | 3.684489  | -1.639339 |
| C | -4.715898 | 3.396353  | -1.35521  |
| C | -5.091292 | 2.196171  | -0.76059  |
| C | 0.258709  | 1.498342  | -0.085058 |
| C | 1.611662  | 1.30901   | -0.01272  |
| C | 2.162446  | 0.001254  | 0.091276  |
| C | 1.267857  | -1.096191 | 0.201725  |
| C | -0.085672 | -0.914687 | 0.154579  |
| N | 3.530584  | -0.200187 | 0.0901    |
| C | 4.08478   | -1.390067 | -0.451615 |
| C | 4.411516  | 0.793395  | 0.593749  |
| C | 5.57635   | 1.11327   | -0.110832 |
| C | 6.431561  | 2.089198  | 0.37988   |
| C | 6.133709  | 2.757083  | 1.566031  |
| C | 4.972094  | 2.436979  | 2.264448  |
| C | 4.112209  | 1.456689  | 1.787417  |
| C | 5.153818  | -2.020477 | 0.19336   |
| C | 5.695265  | -3.179552 | -0.344576 |
| C | 5.175895  | -3.724043 | -1.517259 |
| C | 4.109927  | -3.094635 | -2.155905 |
| C | 3.565389  | -1.93031  | -1.632742 |
| H | -6.720475 | 0.111015  | -0.588609 |
| H | -8.509424 | -1.404433 | 0.086239  |
| H | -8.015981 | -3.402451 | 1.479592  |
| H | -5.674125 | -3.849616 | 2.18601   |
| H | -3.866093 | -2.301233 | 1.544143  |
| H | -1.341976 | 3.012337  | -1.535904 |

|   |           |           |           |
|---|-----------|-----------|-----------|
| H | -3.117666 | 4.607955  | -2.139781 |
| H | -5.483067 | 4.117441  | -1.614741 |
| H | -6.135784 | 2.011758  | -0.551815 |
| H | -0.122997 | 2.507563  | -0.109716 |
| H | 2.270445  | 2.167685  | -0.043162 |
| H | 1.67069   | -2.092512 | 0.339267  |
| H | -0.761319 | -1.751539 | 0.250946  |
| H | 5.797917  | 0.601182  | -1.040223 |
| H | 7.330594  | 2.336361  | -0.172603 |
| H | 6.803666  | 3.52009   | 1.944058  |
| H | 4.738487  | 2.94437   | 3.193167  |
| H | 3.216018  | 1.191459  | 2.337125  |
| H | 5.547627  | -1.602456 | 1.112821  |
| H | 6.521059  | -3.666144 | 0.161441  |
| H | 5.599467  | -4.631541 | -1.930748 |
| H | 3.706917  | -3.504344 | -3.074843 |
| H | 2.748997  | -1.427563 | -2.138776 |

**IND-DPA (T<sub>1</sub>)**

|   |           |           |           |
|---|-----------|-----------|-----------|
| C | -5.187746 | -0.887636 | 0.607335  |
| C | -6.554916 | -0.480245 | 0.589236  |
| C | -7.541398 | -1.295952 | 1.097555  |
| C | -7.225352 | -2.545074 | 1.650722  |
| C | -5.890558 | -2.956782 | 1.699848  |
| C | -4.886193 | -2.152997 | 1.199179  |
| C | -4.144954 | -0.108126 | 0.086432  |
| N | -2.792318 | -0.560693 | 0.290287  |
| C | -4.135807 | 1.130709  | -0.653965 |
| N | -2.027538 | 0.411187  | -0.230523 |
| C | -0.631554 | 0.293359  | -0.17828  |
| C | -2.771784 | 1.438514  | -0.865036 |

|   |           |           |           |
|---|-----------|-----------|-----------|
| C | -2.350892 | 2.49901   | -1.630475 |
| C | -3.34636  | 3.338735  | -2.179402 |
| C | -4.685074 | 3.076725  | -1.971236 |
| C | -5.099302 | 1.962633  | -1.219256 |
| C | 0.187035  | 1.421403  | -0.06535  |
| C | 1.562282  | 1.278995  | -0.001517 |
| C | 2.155262  | 0.009692  | -0.021063 |
| C | 1.323018  | -1.116449 | -0.102595 |
| C | -0.049746 | -0.979279 | -0.184832 |
| N | 3.55218   | -0.131887 | 0.056108  |
| C | 4.205709  | -1.198379 | -0.613557 |
| C | 4.32161   | 0.771475  | 0.835259  |
| C | 5.540523  | 1.252214  | 0.34997   |
| C | 6.302415  | 2.123132  | 1.118889  |
| C | 5.853724  | 2.537816  | 2.369714  |
| C | 4.635854  | 2.064436  | 2.849978  |
| C | 3.876083  | 1.179302  | 2.095008  |
| C | 5.234692  | -1.898774 | 0.021444  |
| C | 5.886042  | -2.932829 | -0.639596 |
| C | 5.510707  | -3.293073 | -1.930615 |
| C | 4.480848  | -2.600055 | -2.560698 |
| C | 3.836051  | -1.552726 | -1.913759 |
| H | -6.826181 | 0.492376  | 0.204826  |
| H | -8.572658 | -0.961613 | 1.077201  |
| H | -8.008948 | -3.180569 | 2.045594  |
| H | -5.638805 | -3.916784 | 2.136847  |
| H | -3.853777 | -2.473364 | 1.2391    |
| H | -1.306464 | 2.685317  | -1.838136 |
| H | -3.044756 | 4.190752  | -2.776697 |
| H | -5.435283 | 3.727468  | -2.404721 |

|   |           |           |           |
|---|-----------|-----------|-----------|
| H | -6.156559 | 1.7626    | -1.123302 |
| H | -0.247719 | 2.409499  | 0.01298   |
| H | 2.18567   | 2.161255  | 0.081591  |
| H | 1.762391  | -2.106966 | -0.103351 |
| H | -0.68964  | -1.849969 | -0.243544 |
| H | 5.886433  | 0.936806  | -0.628162 |
| H | 7.247129  | 2.487959  | 0.731539  |
| H | 6.447755  | 3.221221  | 2.964971  |
| H | 4.278777  | 2.374035  | 3.825656  |
| H | 2.935275  | 0.7998    | 2.478418  |
| H | 5.520992  | -1.627016 | 1.031292  |
| H | 6.683969  | -3.46662  | -0.135606 |
| H | 6.016348  | -4.104337 | -2.441151 |
| H | 4.184143  | -2.865393 | -3.569169 |
| H | 3.044319  | -1.005333 | -2.413308 |
